# Supplementary material
Source: PubMed Central journal article supplement (PMC6687794)
Supplement: 12250_2019_111_MOESM1_ESM.pdf [file 12250_2019_111_MOESM1_ESM.pdf]

## Electronic Supplementary Material

### Effect of Loss-of-function of the Herpes Simplex Virus-1 MicroRNA H6-5p on Virus Replication

Rongquan Huang<sup>#1</sup>, Xusha Zhou<sup>#1</sup>, Shuqi Ren<sup>1</sup>, Xianjie Liu<sup>2</sup>, Zhiyuan Han<sup>1,✉</sup>, Grace Guoying Zhou<sup>2,✉</sup>

1. School of Basic Medical Sciences, Guangzhou Medical University, Guangzhou 511436, China

2. Shenzhen International Institute for Biomedical Research, Shenzhen 518116, China

Supporting information to DOI: 10.1007/s12250-019-00111-6

Table S1. miRNA Sponge Sequence

| miRNA sponge      | Sequence (The underlined nucleotides indicate the linker sequence)                                                                                                                                                                                                                                                                                                                    |
|-------------------|---------------------------------------------------------------------------------------------------------------------------------------------------------------------------------------------------------------------------------------------------------------------------------------------------------------------------------------------------------------------------------------|
| Scramble sequence | 5'-AAACGTGACACGTTCCGGAGAA-3'                                                                                                                                                                                                                                                                                                                                                          |
| miR-H6-5p sponge  | 5'-<br>GGTACACCCCGGACCTTCCACCA <u>AATT</u> GGTACACCCCGGACCTTCCACC<br><u>AATT</u> GGTACACCCCGGACCTTCCACCA <u>AATT</u> GGTACACCCCGGACCTTCC<br>CACC <u>AATT</u> GGTACACCCCGGACCTTCCACCA <u>AATT</u> GGTACACCCCGGAC<br>CTTCCACCA <u>AATT</u> GGTACACCCCGGACCTTCCACCA <u>AATT</u> GGTACACCC<br>GGACCTTCCACCA <u>AATT</u> GGTACACCCCGGACCTTCCACCA <u>AATT</u> GGTACA<br>CCCCGGACCTTCCACC-3' |

Table S2. miRNA, 18s RNA and U6 snRNA primers and probes used in this study

| miRNA       | Stem-loop RT primer                                                       | Forward primer                          | Reverse primer                     | Probe                                                  |
|-------------|---------------------------------------------------------------------------|-----------------------------------------|------------------------------------|--------------------------------------------------------|
| H6-5p       | 5'-<br>GTCGTATCCAGTGCAG<br>GGTCCGAGGTATTTCGC<br>ACTGGATACGACTACA<br>CC-3' | 5'-<br>CAAGACGGTG<br>GAAGGCAGG-<br>3'   | 5'-<br>CCAGTGCAGGGT<br>CCGAGGTA-3' | 5'- (FAM)<br>TGGATACGACTCC<br>ACT(MGB) -3'             |
| H6-3p       | 5'-<br>GTCGTATCCAGTGCAG<br>GGTCCGAGGTATTTCGC<br>ACTGGATACGACGGGA<br>TG-3' | 5'-<br>TCATAAACT<br>TCCCGTCCTT<br>CC-3' | 5'-<br>CCAGTGCAGGGT<br>CCGAGGTA-3' | 5'- (FAM)<br>ATACGACAGGGTG<br>GAA(MGB) -3'             |
| H1-5p       | 5'-<br>GTCGTATCCAGTGCAG<br>GGTCCGAGGTATTTCGC<br>ACTGGATACGACTTCC<br>AC-3' | 5'-<br>CACGCAGATG<br>GAAGGACGG-<br>3'   | 5'-<br>CCAGTGCAGGGT<br>CCGAGGTA-3' | 5'- (FAM)<br>TGGATACGACTAC<br>ACCCCCT (MGB) -<br>3'    |
| H1-3p       | 5'-<br>GTCGTATCCAGTGCAG<br>GGTCCGAGGTATTTCGC<br>ACTGGATACGACAGGG<br>TG-3' | 5'-<br>CTCGTTACA<br>CCCCCTGC-<br>3'     | 5'-<br>CCAGTGCAGGGT<br>CCGAGGTA-3' | 5'- (FAM)<br>TGGATACGACGGG<br>ATGGA (MGB) -3'          |
| 18s<br>RNA  | 5'-CGCTCCACCA<br>ACTAAGA ACG-3'                                           | 5'-CTCAAC<br>ACGGGAAACC<br>TCAC-3'      | 5'-CGCTCCA<br>CCAATAAGA<br>ACG-3'  | 5'- (FAM)<br>CAGGATTGACAGA<br>TTGA (MGB) -3'           |
| U6<br>snRNA | 5'-<br>CTCGCTTCGGCAGCAC<br>A -3'                                          | 5'-<br>AACGCTTAC<br>GAATTTGCGT-<br>3'   | 5'-<br>AACGCTTACGA<br>ATTTGCGT-3'  | 5'- (FAM)<br>CTCTGTATCGTTC<br>CAATTTAGTAT<br>(MGB) -3' |

Table S3. Potential targeted genes of miR-H6-5p

| Target gene | Gene name                                                                                             |
|-------------|-------------------------------------------------------------------------------------------------------|
| CCBL2       | cysteine conjugate-beta lyase 2                                                                       |
| KCNMA1      | potassium large conductance calcium-activated channel, subfamily M, alpha member 1                    |
| ABL2        | v-abl Abelson murine leukemia viral oncogene homolog 2 (arg, Abelson-related gene)                    |
| AMMECR1     | Alport syndrome, mental retardation, midface hypoplasia and elliptocytosis chromosomal region, gene 1 |
| AMT         | aminomethyltransferase                                                                                |
| ANK3        | ankyrin 3, node of Ranvier (ankyrin G)                                                                |
| AP3M1       | adaptor-related protein complex 3, mu 1 subunit                                                       |
| APLP2       | amyloid beta (A4) precursor-like protein 2                                                            |
| ARL6IP1     | ADP-ribosylation factor-like 6 interacting protein 1                                                  |
| ARPP-19     | cyclic AMP phosphoprotein, 19 kD                                                                      |
| BZW1        | basic leucine zipper and W2 domains 1                                                                 |
| CBY1        | chibby homolog 1 (Drosophila)                                                                         |
| CC2D1B      | coiled-coil and C2 domain containing 1B                                                               |
| CCDC80      | coiled-coil domain containing 80                                                                      |
| CDH11       | cadherin 11, type 2, OB-cadherin (osteoblast)                                                         |
| CHD5        | chromodomain helicase DNA binding protein 5                                                           |
| COL1A2      | collagen, type I, alpha 2                                                                             |
| COLQ        | collagen-like tail subunit (single strand of homotrimer) of asymmetric acetylcholinesterase           |
| DLG4        | discs, large homolog 4 (Drosophila)                                                                   |
| ELP3        | elongation protein 3 homolog (S. cerevisiae)                                                          |
| FCHSD2      | FCH and double SH3 domains 2                                                                          |
| FHL5        | four and a half LIM domains 5                                                                         |
| FOXP3       | forkhead box N3                                                                                       |
| GATAD2B     | GATA zinc finger domain containing 2B                                                                 |
| GPR124      | G protein-coupled receptor 124                                                                        |
| GUSB        | glucuronidase, beta                                                                                   |
| HECTD3      | HECT domain containing 3                                                                              |
| HPN         | hepsin (transmembrane protease, serine 1)                                                             |
| HRH4        | histamine receptor H4                                                                                 |
| JHDM1D      | jumonji C domain containing histone demethylase 1 homolog D (S. cerevisiae)                           |
| KIAA1045    | KIAA1045                                                                                              |
| KPNA1       | karyopherin alpha 1 (importin alpha 5)                                                                |
| LOC751071   | hypothetical protein LOC751071                                                                        |
| LPP         | LIM domain containing preferred translocation partner in lipoma                                       |
| LRIG1       | leucine-rich repeats and immunoglobulin-like domains 1                                                |
| MAF         | v-maf musculoaponeurotic fibrosarcoma oncogene homolog (avian)                                        |
| MED1        | mediator complex subunit 1                                                                            |
| NRN1        | neuritin 1                                                                                            |
| OXR1        | oxidation resistance 1                                                                                |
| PANK2       | pantothenate kinase 2 (Hallervorden-Spatz syndrome)                                                   |
| PCMT1       | protein-L-isoaspartate (D-aspartate) O-methyltransferase                                              |
| PDE1C       | phosphodiesterase 1C, calmodulin-dependent 70kDa                                                      |
| PEG10       | paternally expressed 10                                                                               |
| * PICALM    | phosphatidylinositol binding clathrin assembly protein                                                |
| PTPRJ       | protein tyrosine phosphatase, receptor type, J                                                        |
| RAB2B       | RAB2B, member RAS oncogene family                                                                     |
| RAB6B       | RAB6B, member RAS oncogene family                                                                     |
| RBMX        | RNA binding motif protein, X-linked                                                                   |
| RNF144A     | ring finger protein 144A                                                                              |
| RPS6KB1     | ribosomal protein S6 kinase, 70kDa, polypeptide 1                                                     |
| SELL        | selectin L (lymphocyte adhesion molecule 1)                                                           |

|           |                                                                            |
|-----------|----------------------------------------------------------------------------|
| SETD8     | SET domain containing (lysine methyltransferase) 8                         |
| SLAMF1    | signaling lymphocytic activation molecule family member 1                  |
| SLC16A2   | solute carrier family 16, member 2 (monocarboxylic acid transporter 8)     |
| SNIP      | SNAP25-interacting protein                                                 |
| SPRY3     | sprouty homolog 3 (Drosophila)                                             |
| STAU2     | staufen, RNA binding protein, homolog 2 (Drosophila)                       |
| STX6      | syntaxin 6                                                                 |
| SV2A      | synaptic vesicle glycoprotein 2A                                           |
| TACSTD1   | tumor-associated calcium signal transducer 1                               |
| TDRD1     | tudor domain containing 1                                                  |
| TIPARP    | TCDD-inducible poly(ADP-ribose) polymerase                                 |
| TMOD1     | tropomodulin 1                                                             |
| WDR76     | WD repeat domain 76                                                        |
| WWP1      | WW domain containing E3 ubiquitin protein ligase 1                         |
| * ZDHHC3  | zinc finger, DHHC-type containing 3                                        |
| ZHX3      | zinc fingers and homeoboxes 3                                              |
| ZSCAN22   | zinc finger and SCAN domain containing 22                                  |
| hCG_18385 | similar to cAMP-regulated phosphoprotein                                   |
| MTF1      | metal-regulatory transcription factor 1                                    |
| ADAMTS5   | ADAM metalloproteinase with thrombospondin type 1 motif, 5 (aggrecanase-2) |
| AFF4      | AF4/FMR2 family, member 4                                                  |
| * AQP4    | aquaporin 4                                                                |
| ARFIP2    | ADP-ribosylation factor interacting protein 2 (arfaptin 2)                 |
| ARID1B    | AT rich interactive domain 1B (SWI1-like)                                  |
| ARID4A    | AT rich interactive domain 4A (RBP1-like)                                  |
| ASXL1     | additional sex combs like 1 (Drosophila)                                   |
| ATXN1     | ataxin 1                                                                   |
| C1orf151  | chromosome 1 open reading frame 151                                        |
| C20orf160 | chromosome 20 open reading frame 160                                       |
| C5orf41   | chromosome 5 open reading frame 41                                         |
| CACNB1    | calcium channel, voltage-dependent, beta 1 subunit                         |
| CISH      | cytokine inducible SH2-containing protein                                  |
| CKAP4     | cytoskeleton-associated protein 4                                          |
| DLGAP1    | discs, large (Drosophila) homolog-associated protein 1                     |
| EOMES     | eomesodermin homolog (Xenopus laevis)                                      |
| ESRRG     | estrogen-related receptor gamma                                            |
| FAM110B   | family with sequence similarity 110, member B                              |
| FAM120C   | family with sequence similarity 120C                                       |
| FAM71F2   | family with sequence similarity 71, member F2                              |
| FBXO33    | F-box protein 33                                                           |
| FBXO46    | F-box protein 46                                                           |
| HIPK2     | homeodomain interacting protein kinase 2                                   |
| ICA1L     | islet cell autoantigen 1,69kDa-like                                        |
| JARID1A   | jumonji, AT rich interactive domain 1A                                     |
| KIAA2018  | KIAA2018                                                                   |
| LPPR2     | lipid phosphate phosphatase-related protein type 2                         |
| NAMPT     | nicotinamide phosphoribosyltransferase                                     |
| NLGN2     | neuroligin 2                                                               |
| OLFML2A   | olfactomedin-like 2A                                                       |
| OPCML     | opioid binding protein/cell adhesion molecule-like                         |
| PDE11A    | phosphodiesterase 11A                                                      |
| PHOX2B    | paired-like homeobox 2b                                                    |
| PLCB1     | phospholipase C, beta 1 (phosphoinositide-specific)                        |
| POGK      | pogo transposable element with KRAB domain                                 |
| PPP1R2    | protein phosphatase 1, regulatory (inhibitor) subunit 2                    |
| PRPF4B    | PRP4 pre-mRNA processing factor 4 homolog B (yeast)                        |
| RNF150    | ring finger protein 150                                                    |

|          |                                                                                 |
|----------|---------------------------------------------------------------------------------|
| RNF166   | ring finger protein 166                                                         |
| * SENP7  | SUMO1/sentrin specific peptidase 7                                              |
| SLC25A1  | solute carrier family 25 (mitochondrial carrier; citrate transporter), member 1 |
| SPON1    | spondin 1, extracellular matrix protein                                         |
| SPTB     | spectrin, beta, erythrocytic (includes spherocytosis, clinical type I)          |
| SPTLC2   | serine palmitoyltransferase, long chain base subunit 2                          |
| ST8SIA4  | ST8 alpha-N-acetyl-neuraminide alpha-2,8-sialyltransferase 4                    |
| TCF12    | transcription factor 12 (HTF4, helix-loop-helix transcription factors 4)        |
| ZNF24    | zinc finger protein 24                                                          |
| ZNF655   | zinc finger protein 655                                                         |
| AAK1     | AP2 associated kinase 1                                                         |
| ABHD2    | abhydrolase domain containing 2                                                 |
| AGTR1    | angiotensin II receptor, type 1                                                 |
| ALCAM    | activated leukocyte cell adhesion molecule                                      |
| ANKRD12  | ankyrin repeat domain 12                                                        |
| ANXA7    | annexin A7                                                                      |
| APBB2    | amyloid beta (A4) precursor protein-binding, family B, member 2 (Fe65-like)     |
| ARHGAP29 | Rho GTPase activating protein 29                                                |
| ARHGEF3  | Rho guanine nucleotide exchange factor (GEF) 3                                  |
| ATP6V0D2 | ATPase, H <sup>+</sup> transporting, lysosomal 38kDa, V0 subunit d2             |
| BSN      | bassoon (presynaptic cytomatrix protein)                                        |
| BTG1     | B-cell translocation gene 1, anti-proliferative                                 |
| C12orf12 | chromosome 12 open reading frame 12                                             |
| C12orf42 | chromosome 12 open reading frame 42                                             |
| C2CD3    | C2 calcium-dependent domain containing 3                                        |
| C9orf102 | chromosome 9 open reading frame 102                                             |
| CAMKK2   | calcium/calmodulin-dependent protein kinase kinase 2, beta                      |
| CAMTA1   | calmodulin binding transcription activator 1                                    |
| CAPRN1   | cell cycle associated protein 1                                                 |
| CHST4    | carbohydrate (N-acetylglucosamine 6-O) sulfotransferase 4                       |
| CMYA5    | cardiomyopathy associated 5                                                     |
| CNIH     | cornichon homolog (Drosophila)                                                  |
| DNALI1   | dynein, axonemal, light intermediate chain 1                                    |
| FBXO30   | F-box protein 30                                                                |
| FOXA1    | forkhead box A1                                                                 |
| FUT9     | fucosyltransferase 9 (alpha (1,3) fucosyltransferase)                           |
| HNF1B    | HNF1 homeobox B                                                                 |
| HNRNPU   | heterogeneous nuclear ribonucleoprotein U (scaffold attachment factor A)        |
| IGF1R    | insulin-like growth factor 1 receptor                                           |
| * IKBKB  | inhibitor of kappa light polypeptide gene enhancer in B-cells, kinase beta      |
| KIAA1219 | KIAA1219                                                                        |
| LARP5    | La ribonucleoprotein domain family, member 5                                    |
| MAFF     | v-maf musculoaponeurotic fibrosarcoma oncogene homolog F (avian)                |
| MAP1B    | microtubule-associated protein 1B                                               |
| MAPKAPK5 | mitogen-activated protein kinase-activated protein kinase 5                     |
| MARK1    | MAP/microtubule affinity-regulating kinase 1                                    |
| MEIS1    | Meis homeobox 1                                                                 |
| MEIS2    | Meis homeobox 2                                                                 |
| MKRN3    | makorin, ring finger protein, 3                                                 |
| MMD      | monocyte to macrophage differentiation-associated                               |
| MPHOSPH8 | M-phase phosphoprotein 8                                                        |
| MS4A1    | membrane-spanning 4-domains, subfamily A, member 1                              |
| NARG1    | NMDA receptor regulated 1                                                       |
| OTUD5    | OTU domain containing 5                                                         |
| PCDH9    | protocadherin 9                                                                 |
| PDCD6IP  | programmed cell death 6 interacting protein                                     |
| PHF20L1  | PHD finger protein 20-like 1                                                    |

|                    |                                                                                                    |
|--------------------|----------------------------------------------------------------------------------------------------|
| PTPRB              | protein tyrosine phosphatase, receptor type, B                                                     |
| RAVER2             | ribonucleoprotein, PTB-binding 2                                                                   |
| RHOBTB2            | Rho-related BTB domain containing 2                                                                |
| RNF128             | ring finger protein 128                                                                            |
| SACM1L             | SAC1 suppressor of actin mutations 1-like (yeast)                                                  |
| SAMD12             | sterile alpha motif domain containing 12                                                           |
| SCD5               | stearoyl-CoA desaturase 5                                                                          |
| SCN8A              | sodium channel, voltage gated, type VIII, alpha subunit                                            |
| SEMA6A             | sema domain, transmembrane domain (TM), and cytoplasmic domain, (semaphorin) 6A                    |
| SERTAD3            | SERTA domain containing 3                                                                          |
| SIPA1L2            | signal-induced proliferation-associated 1 like 2                                                   |
| SIRT5              | sirtuin (silent mating type information regulation 2 homolog) 5 ( <i>S. cerevisiae</i> )           |
| SLC10A7            | solute carrier family 10 (sodium/bile acid cotransporter family), member 7                         |
| SMG1               | PI-3-kinase-related kinase SMG-1                                                                   |
| SNAP25             | synaptosomal-associated protein, 25kDa                                                             |
| SNTB2              | syntrophin, beta 2 (dystrophin-associated protein A1, 59kDa, basic component 2)                    |
| SOX10              | SRY (sex determining region Y)-box 10                                                              |
| SPRR2B             | small proline-rich protein 2B                                                                      |
| SPRR2E             | small proline-rich protein 2E                                                                      |
| SS18               | synovial sarcoma translocation, chromosome 18                                                      |
| SSR1               | signal sequence receptor, alpha (translocon-associated protein alpha)                              |
| ST8SIA1            | ST8 alpha-N-acetyl-neuraminide alpha-2,8-sialyltransferase 1                                       |
| STIM2              | stromal interaction molecule 2                                                                     |
| TANC2              | tetratricopeptide repeat, ankyrin repeat and coiled-coil containing 2                              |
| THRB               | thyroid hormone receptor, beta (erythroblastic leukemia viral (v-erb-a) oncogene homolog 2, avian) |
| TMEM174            | transmembrane protein 174                                                                          |
| TMEM189-<br>UBE2V1 | TMEM189-UBE2V1                                                                                     |
| TRAM2              | translocation associated membrane protein 2                                                        |
| UBE2V1             | ubiquitin-conjugating enzyme E2 variant 1                                                          |
| WNK1               | WNK lysine deficient protein kinase 1                                                              |
| ZBTB41             | zinc finger and BTB domain containing 41                                                           |
| ZNF318             | zinc finger protein 318                                                                            |
| ZYG11B             | zyg-11 homolog B ( <i>C. elegans</i> )                                                             |
